# Supplementary material for: Beyond study participants: a framework for engaging patients in the selection or development of clinical outcome assessments for evaluating the benefits of treatment in medical product development
Source: Springer Nature journal article supplement (doi:10.1007/s11136-017-1577-6), 2017-04-19
Supplement: MOESM1 [file 12232112]

**Appendix**

**Table S1. PE Programs/Initiatives: North America**

| **Country**  **Agency/Organization** | **Program/Initiative** | **Year Established** | **Description** |
| --- | --- | --- | --- |
| **United States (US)** |  |  |  |
| Agency for HealthCare Research and Quality (AHRQ) | Effective Health Care (EHC) Program[55,56] | 2005 | Funding mechanism that helps individual researchers, research centers, and academic organizations to produce effectiveness and comparative-effectiveness research for clinicians, consumers, and policymakers |
| Food & Drug Administration (FDA), Office of Health and Constituent Affairs (OHCA) | FDA Patient Representative Program[57] | 1991 | Competitive program aimed to help provide a mechanism for incorporating patient advocate’s voices into advisory committee and medical product development discussions |
| FDA, Office of Health and Constituent Affairs (OHCA) | Patient Network[58] | 2012 | Web-based resource designed to help provide healthcare information to patients, caregivers, and other community stakeholders |
| FDA, Office of Health and Constituent Affairs (OHCA) | FDASIA Section 1137[59] | 2012 | Statute that helps advance the patient-centric public health agenda in the US by facilitating PE early in the medical product development review process |
| FDA, Center for Drug Evaluation and Research (CDER) and Center for Biologics Evaluation and Review (CBER) | Patient-Focused Drug Development initiative[60] | 2013 | Initiative implemented as part of the Prescription Drug User Fee Act V (PDUFA V) to obtain the patient perspective on diseases and their treatments; as of October 4, 2016, the FDA has held 20 of the 24 disease-specific meetings |
| FDA, Center for Devices and Radiological Health (CDRH) | Device Patient Preference Initiative[61] | 2013 | Initiative to develop a systematic way of eliciting, measuring, and incorporating patient preference information, where appropriate, into the medical device total product life cycle |
| FDA and Europeans Medicines Agency (EMA) | FDA and EMA PE Cluster[58] | 2015 | A working group formed by existing FDA/EMA clusters that facilitate sharing of best practices involving patients in the drug and biologic regulatory lifecycles |
| FDA, Center for Devices and Radiological Health (CDRH) | Patient Engagement Advisory Committee[62] | 2015 | Committee with relevant skills and perspectives that provides advice to the FDA on complex issues to help improve communication on benefits, risks, and clinical outcomes; and increase integration of patient perspectives into the regulatory process for medical devices |
| FDA and the Clinical Trials Transformation Initiative (CTTI) | Multi-stakeholder Engagement Initiative[63] | Coming soon | Planned public-private partnership that will convene patient and caregiver stakeholder working groups to facilitate information, idea, and experience sharing on matters related to FDA PE initiatives |
| Patient-Centered Outcomes Research Institute (PCORI) | Grant funding initiatives[64] and PCORI Ambassador Program[65] | 2010 and 2012 | An independent non-profit, non-governmental organization that funds comparative clinical- effectiveness research and supports work aimed to improve the methods that help patients, caregivers, clinicians, employers, insurers, and policy makers make informed health decisions. The Ambassador Program aims to unite individual and organizational Ambassadors around the promise of PCORI |
| PCORI[66] | Patient-Powered Networks | 2013 | <http://pcornet.org/patient-powered-research-networks/> |
| **Canada** |  |  |  |
| Canadian Regulatory Agency, Health Canada | Patient Involvement Pilot Project[24] | 2014 | A project that generated qualitative data from patients, caregivers, physicians, and patient groups to provide input into the orphan drug submission review process |

**Table S2. PE Programs/Initiatives: Europe**

| **Agency/Organization** | **Initiative** | **Established** | **Description** |
| --- | --- | --- | --- |
| European Medicines Agency (EMA) | Patient and Consumer Working Party[67] | 2006 | Working group established to provide a forum for EMA patients and other consumers to exchange information and discuss common interest medical topics. The group advises the EMA and its human scientific committees on all matters of interest in relation to medicines |
| EMA | Benefit-Risk Methodology Project[68] | 2009 | A three-year project aimed at identifying benefit-risk decision-making models that can be used to inform the EMA’s work—to make the assessment of the benefits and risks of medicines more consistent, more transparent, and easier to audit |
| EMA | Patients and Healthcare Professionals Department[69] | 2014 | Department established to ensure that the work of the EMA is understood and communicated to patients, consumers, and healthcare professionals’ groups via training, workshops, the working parties, and targeted communication |
| European Union and the European pharmaceutical industry (EFPIA) | IMI-Patient Advisory Council  (IMI-PAC) | 2008 | IMI is a public-private partnership between 34 partners in the European Union and the European pharmaceutical industry dedicated to increasing development of—and patient access to—innovative medicines for unmet medical and social needs. The IMI-PAC includes members of patient organizations to bring the voice of the patient to its governing board and to ensure that the patients view is considered in the strategy and process of the initiatives |
| European Union and the European pharmaceutical industry (EFPIA) | IMI[70] Benefit-Risk Assessments During the Drug Life Cycle (PREFER) Project[71] | 2016 | IMIs PREFER project is a five-year project involving a public-private partnership among 32 European and US partners from the academic/public and industrial fields aimed to develop and implement methodologies suitable for recognizing and eliciting patient preferences regarding drug intake |
| European Patients Forum (EPF) | Value +[72] | 2008 | An umbrella organization that works with patients’ groups in public health and health advocacy across Europe. Members represent specific chronic disease groups at EU level or are national coalitions of patients. |
| European Patients Academy on Therapeutic Innovation (EUPATI) | European Patients' Academy[73]/Patient Expert Training Course | 2014 | EUPATI is a patient-led initiative that aims provide the first academy with training courses, educational material, and an online public library that will empower patients to engage more effectively in the development and approval of new treatments and become true partners in pharmaceutical research and development |
| National Institute of Health and Care Excellence[74] | Patient and public involvement | 1999 | Initiative to ensure that lay people, and organizations representing their interests, have opportunities to contribute to developing NICE guidance, advice and quality standards, and support their implementation, and to ensure that NICE guidance and other products have a greater focus and relevance for the people most directly affected by our recommendations. |
| Health Technology Assessment International (HTAi) | Values and quality standards for patient involvement in HTA by the HTAi Interest Sub-Group for Patient/Citizen Involvement in HTA | 2014 | Worked with stakeholders to develop values and quality standards for patient involvement in HTA. The quality standards are practical steps that HTA bodies can take to ensure effective involvement of patients in an individual HTA and when shaping the general process for an HTA |
